# Supplementary material for: Improvement of protein emulsion stability through glycosylated black bean protein covalent interaction with (−)-epigallocatechin-3-gallate
Source: Royal Society of Chemistry journal article supplement (doi:10.1039/d0ra08756d), 2021-01-01
Supplement: d0ra08756d1.pdf [file d0ra08756d1.pdf]

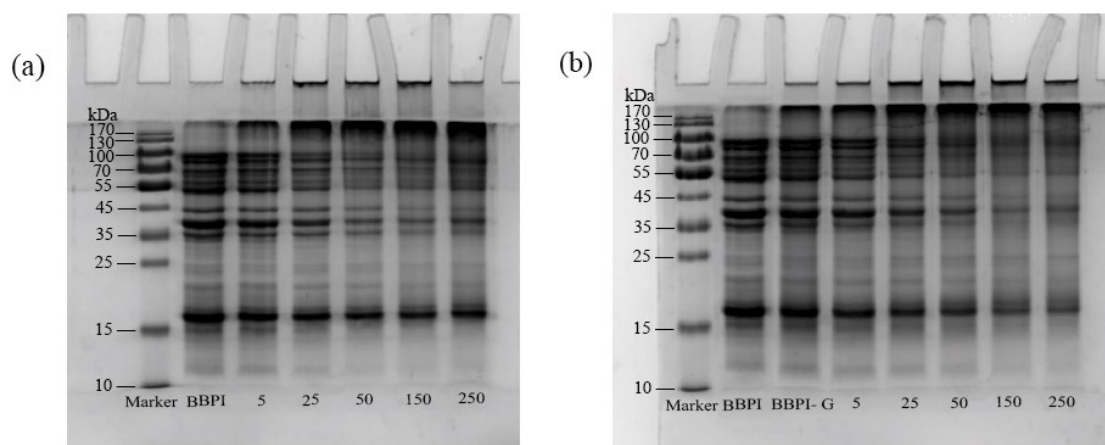

**Supplementary Fig. S1** SDS-Page of (a) BBPI-EGCG covalent bounded by BBPI and different concentration of EGCG and (b) BBPI-G-EGCG covalent compounds covalent bounded by BBPI-G and different concentration of EGCG.

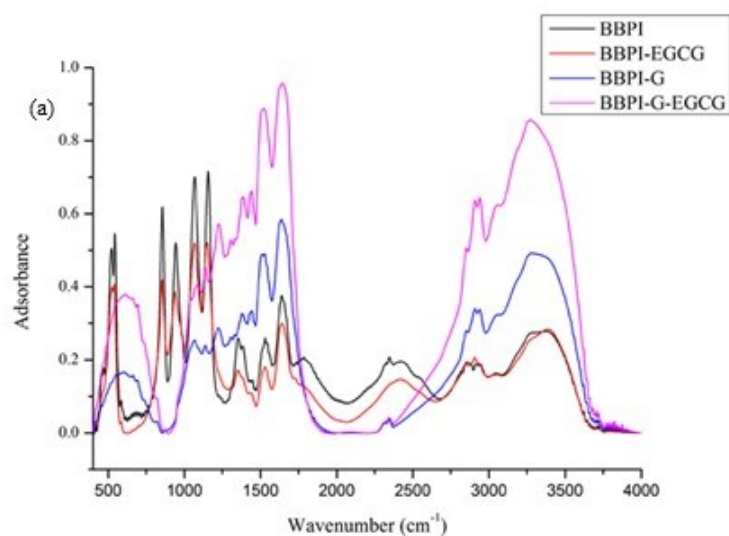

**Supplementary Fig. S2** (a) is FTIR of BBPI, BBPI-EGCG, BBPI-G-EGCG, BBPI-G-EGCG. (b) is peak fitting image of BBPI. (c) is peak fitting image of BBPI-EGCG. (d) is peak fitting image of BBPI-G. (e) is peak fitting image of BBPI-G-EGCG.

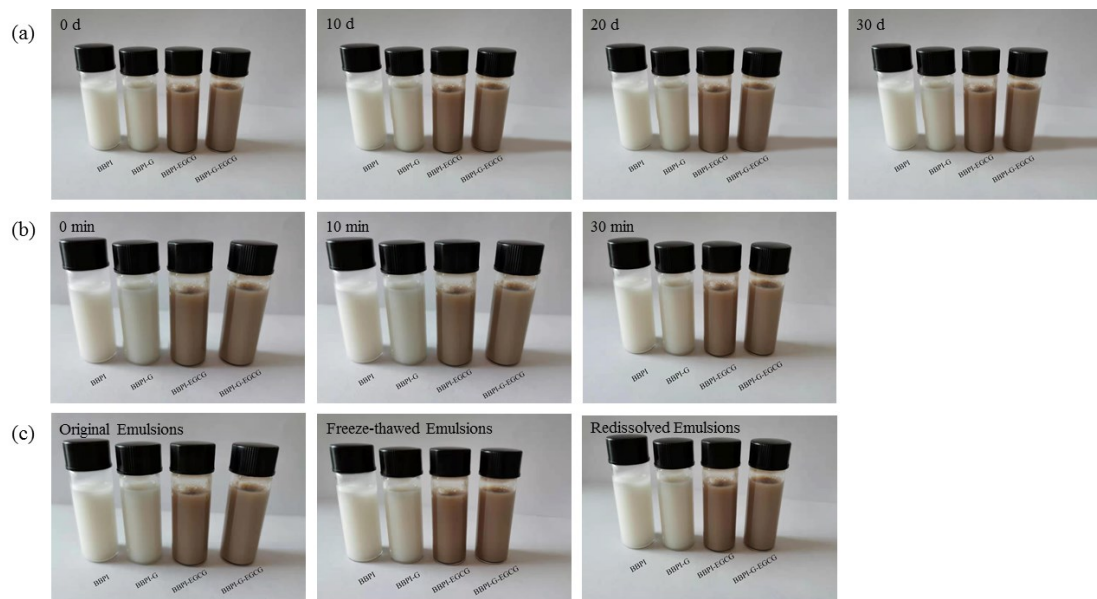

**Supplementary Fig. S3** Appearance of emulsions. (a) is emulsions with different storage time (day). (b) is emulsions with different heating time (min). (c) is original emulsions, freeze-thawed emulsions and redissolved emulsions.
